# Supplementary material for: A revised ocean mixed layer model for better simulating the diurnal variation in ocean skin temperature
Source: Copernicus journal article supplement (doi:10.5194/gmd-17-8553-2024), 2024-12-02
Supplement: Supplementary file 1 [file gmd-17-8553-2024-supplement.zip]

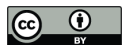

## *Supplement of*

# **A revised ocean mixed layer model for better simulating the diurnal variation in ocean skin temperature**

**Eui-Jong Kang et al.**

*Correspondence to:* Byung-Ju Sohn ([sohn@snu.ac.kr](mailto:sohn@snu.ac.kr)) and Sang-Woo Kim ([sangwookim@snu.ac.kr](mailto:sangwookim@snu.ac.kr))

- [gmd-17-8553-2024-supplement-title-page.pdf](#)
- [Animated\\_Ts\\_hourly\\_variations-forecast\\_mode-2020010101-2020010600.gif.gif](#)
- [Animated\\_Ts\\_hourly\\_variations-reanalysis\\_mode-2020010101-2020010600.gif.gif](#)
- [Kang et al. \(GMD, 2024\)-rev-supplementary material.pdf](#)

The copyright of individual parts of the supplement might differ from the article licence.
