# Supplementary material for: A revised ocean mixed layer model for better simulating the diurnal variation in ocean skin temperature
Source: Copernicus journal article supplement (doi:10.5194/gmd-17-8553-2024), 2024-12-02
Supplement: Supplementary file 2 [file gmd-17-8553-2024-supplement.zip]

Supplementary material for

## **A revised ocean mixed layer model for better simulating the diurnal variation of ocean skin temperature**

Eui-Jong Kang<sup>1</sup>, Byung-Ju Sohn<sup>1,2,\*</sup>, Sang-Woo KIM<sup>1</sup>, Wonho Kim<sup>3</sup>, Young-Cheol Kwon<sup>4</sup>,  
Seung-Bum Kim<sup>4</sup>, Hyoung-Wook Chun<sup>4</sup>, and Chao Liu<sup>2</sup>

<sup>1</sup> School of Earth and Environmental Sciences, Seoul National University (SNU), Seoul, South Korea.

<sup>2</sup> School of Atmospheric Physics, Nanjing University of Information Science and Technology (NUIST), Nanjing, China

<sup>3</sup> Korea Institute of Atmospheric Prediction Systems (KIAPS), Seoul, South Korea

<sup>4</sup> Numerical Modeling Center, Korea Meteorological Administration (KMA), Daejeon, South Korea

*Correspondence to:* Byung-Ju Sohn ([sohn@snu.ac.kr](mailto:sohn@snu.ac.kr)) and Sang-Woo Kim ([sangwookim@snu.ac.kr](mailto:sangwookim@snu.ac.kr))

### **Contents of this file**

Tables S1 to S2

Figures S1 to S3

### **Additional supplementary material (Files uploaded separately)**

Animated\_Ts\_hourly\_variations--forecast\_mode--2020010101-2020010600.gif

Animated\_Ts\_hourly\_variations--reanalysis\_mode--2020010101-2020010600.gif

\*forecast mode ( $T_{\text{warm}}$  does not update)

\*reanalysis mode ( $T_{\text{warm}}$  updates with OSTIA SST at 22 UTC daily)

**Table S1.** Detailed information about the cruises/vessels equipped with the M-AERI.

| #  | Year | Ship                  | Region                                                     | Start date | End date |
|----|------|-----------------------|------------------------------------------------------------|------------|----------|
| 1  | 2013 | Knorr (RV)            | Atlantic Ocean                                             | Feb 13     | Feb 28   |
| 2  | 2013 | Ronald H. Brown (RV)  | North Atlantic Ocean                                       | Nov 11     | Dec 8    |
| 3  | 2014 | Celebrity Equinox     | Caribbean Sea                                              | May 9      | Jun 20   |
| 4  | 2014 | Allure of the Seas.   | Caribbean Sea                                              | Aug 24     | Dec 31   |
| 5  | 2014 | Celebrity Equinox     | Caribbean Sea                                              | Nov 16     | Dec 31   |
| 6  | 2015 | Allure of the Seas.   | Caribbean Sea<br>North Atlantic Ocean<br>Mediterranean Sea | Jan 1      | Nov 29   |
| 7  | 2015 | Celebrity Equinox     | Caribbean Sea                                              | Jan 1      | Dec 26   |
| 8  | 2015 | Minerva Uno (RV)      | Regional                                                   | Mar 27     | Apr 13   |
| 9  | 2015 | Alliance (RV)         | North Atlantic Ocean                                       | Nov 17     | Dec 14   |
| 10 | 2016 | Celebrity Equinox     | Caribbean Sea<br>North Atlantic Ocean<br>Mediterranean Sea | Jan 2      | Dec 31   |
| 11 | 2016 | Ronald H. Brown (R/V) | Pacific                                                    | Nov 7      | Mar 19   |
| 12 | 2017 | Celebrity Equinox     | Caribbean Sea                                              | Jan 1      | Dec 31   |
| 13 | 2017 | Allure of the Seas    | Caribbean Sea                                              | Oct 2      | Nov 26   |
| 14 | 2017 | Minerva Uno (R/V)     | Regional                                                   | May 25     | Jun 11   |
| 15 | 2018 | Celebrity Equinox     | Caribbean Sea                                              | Jan 11     | Sep 23   |
| 16 | 2018 | Adventure of the Seas | Caribbean Sea<br>US East Coast                             | Feb 12     | Dec 31   |
| 17 | 2018 | Allure of the Seas    | Caribbean Sea                                              | Feb 18     | Oct 14   |
| 18 | 2018 | Ronald H. Brown (R/V) | Global                                                     | Mar 7      | Oct 23   |
| 19 | 2019 | Adventure of the Seas | Caribbean Sea<br>US East Coast                             | Jan 1      | Oct 30   |
| 20 | 2019 | Ronald H. Brown (R/V) | North Atlantic Ocean                                       | Feb 24     | Mar 29   |
| 21 | 2019 | Ronald H. Brown (R/V) | US East Coast                                              | May 7      | May 31   |
| 22 | 2019 | Ronald H. Brown (R/V) | US East Coast                                              | Apr 8      | Apr 30   |
| 23 | 2020 | Ronald H. Brown (R/V) | Caribbean Sea                                              | Jan 6      | Feb 13   |
| 24 | 2020 | Ronald H. Brown (R/V) | Caribbean Sea<br>Atlantic Ocean                            | Feb 21     | Apr 17   |

Knorr: Woods Hole Oceanographic Institution (WHOI) research vessel (RV)

Ronald H. Brown: National Oceanic and Atmospheric Administration (NOAA) research vessel (RV)

Minerva Uno: Italy Alpine Ocean Seismic Survey Inc. research vessel (RV)

Alliance: North Atlantic Treaty Organization (NATO) research vessel (RV)

Celebrity Equinox: Royal Caribbean International (RCI) cruise ship

Allure of the Seas: Royal Caribbean International (RCI) cruise ship

Adventure of the Seas: Royal Caribbean International (RCI) cruise ship

**Table S2.** Locations of used buoys in the TAO array

| #  | Location  | #  | Location  | #  | Location  |
|----|-----------|----|-----------|----|-----------|
| 1  | 0° 110°W  | 19 | 2°S 140°W | 37 | 5°S 165°E |
| 2  | 0° 125°W  | 20 | 2°S 155°W | 38 | 5°S 170°W |
| 3  | 0° 140°W  | 21 | 2°S 165°E | 39 | 5°S 180°  |
| 4  | 0° 155°W  | 22 | 2°S 170°W | 40 | 5°S 95°W  |
| 5  | 0° 165°E  | 23 | 2°S 180°  | 41 | 8°N 110°W |
| 6  | 0° 170°W  | 24 | 2°S 95°W  | 42 | 8°N 125°W |
| 7  | 0° 180°   | 25 | 5°N 110°W | 43 | 8°N 155°W |
| 8  | 0° 95°W   | 26 | 5°N 125°W | 44 | 8°N 165°E |
| 9  | 2°N 110°W | 27 | 5°N 140°W | 45 | 8°N 170°W |
| 10 | 2°N 125°W | 28 | 5°N 155°W | 46 | 8°N 180°  |
| 11 | 2°N 140°W | 29 | 5°N 165°E | 47 | 8°N 95°W  |
| 12 | 2°N 155°W | 30 | 5°N 170°W | 48 | 8°S 110°W |
| 13 | 2°N 165°E | 31 | 5°N 180°  | 49 | 8°S 125°W |
| 14 | 2°N 170°W | 32 | 5°N 95°W  | 50 | 8°S 155°W |
| 15 | 2°N 180°  | 33 | 5°S 110°W | 51 | 8°S 165°E |
| 16 | 2°N 95°W  | 34 | 5°S 125°W | 52 | 8°S 170°W |
| 17 | 2°S 110°W | 35 | 5°S 140°W | 53 | 8°S 180°  |
| 18 | 2°S 125°W | 36 | 5°S 155°W | 54 | 8°S 95°W  |

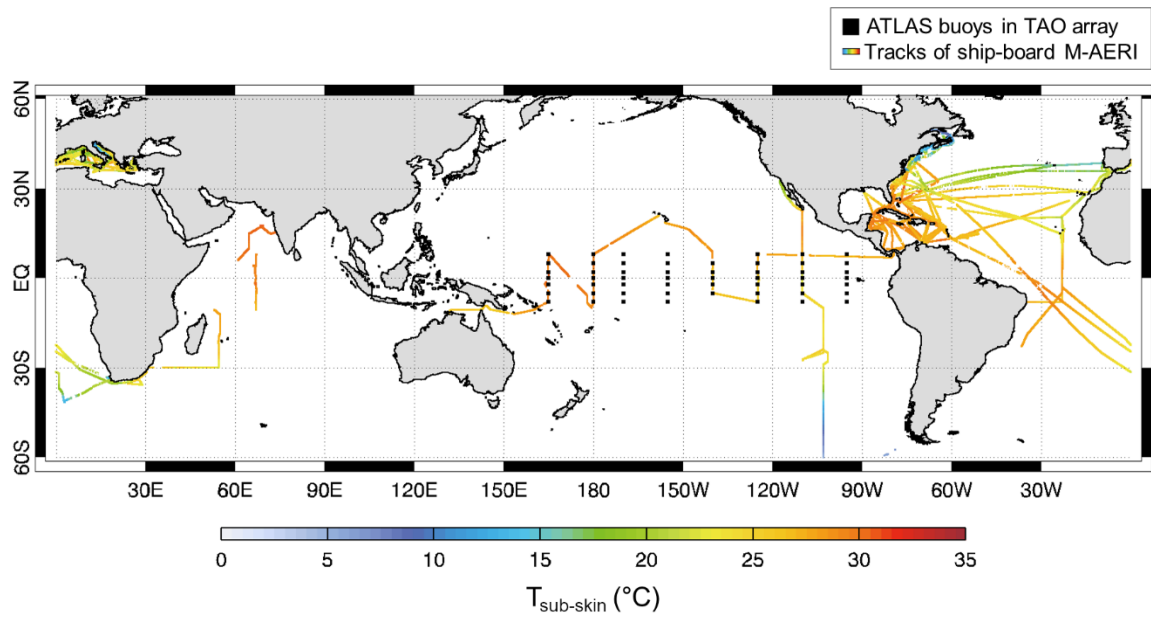

**Figure S1.** ATLAS mooring buoy locations given with black squares in the tropical Pacific and ship tracks equipped with M-AERI instrument depicted with solid color lines.

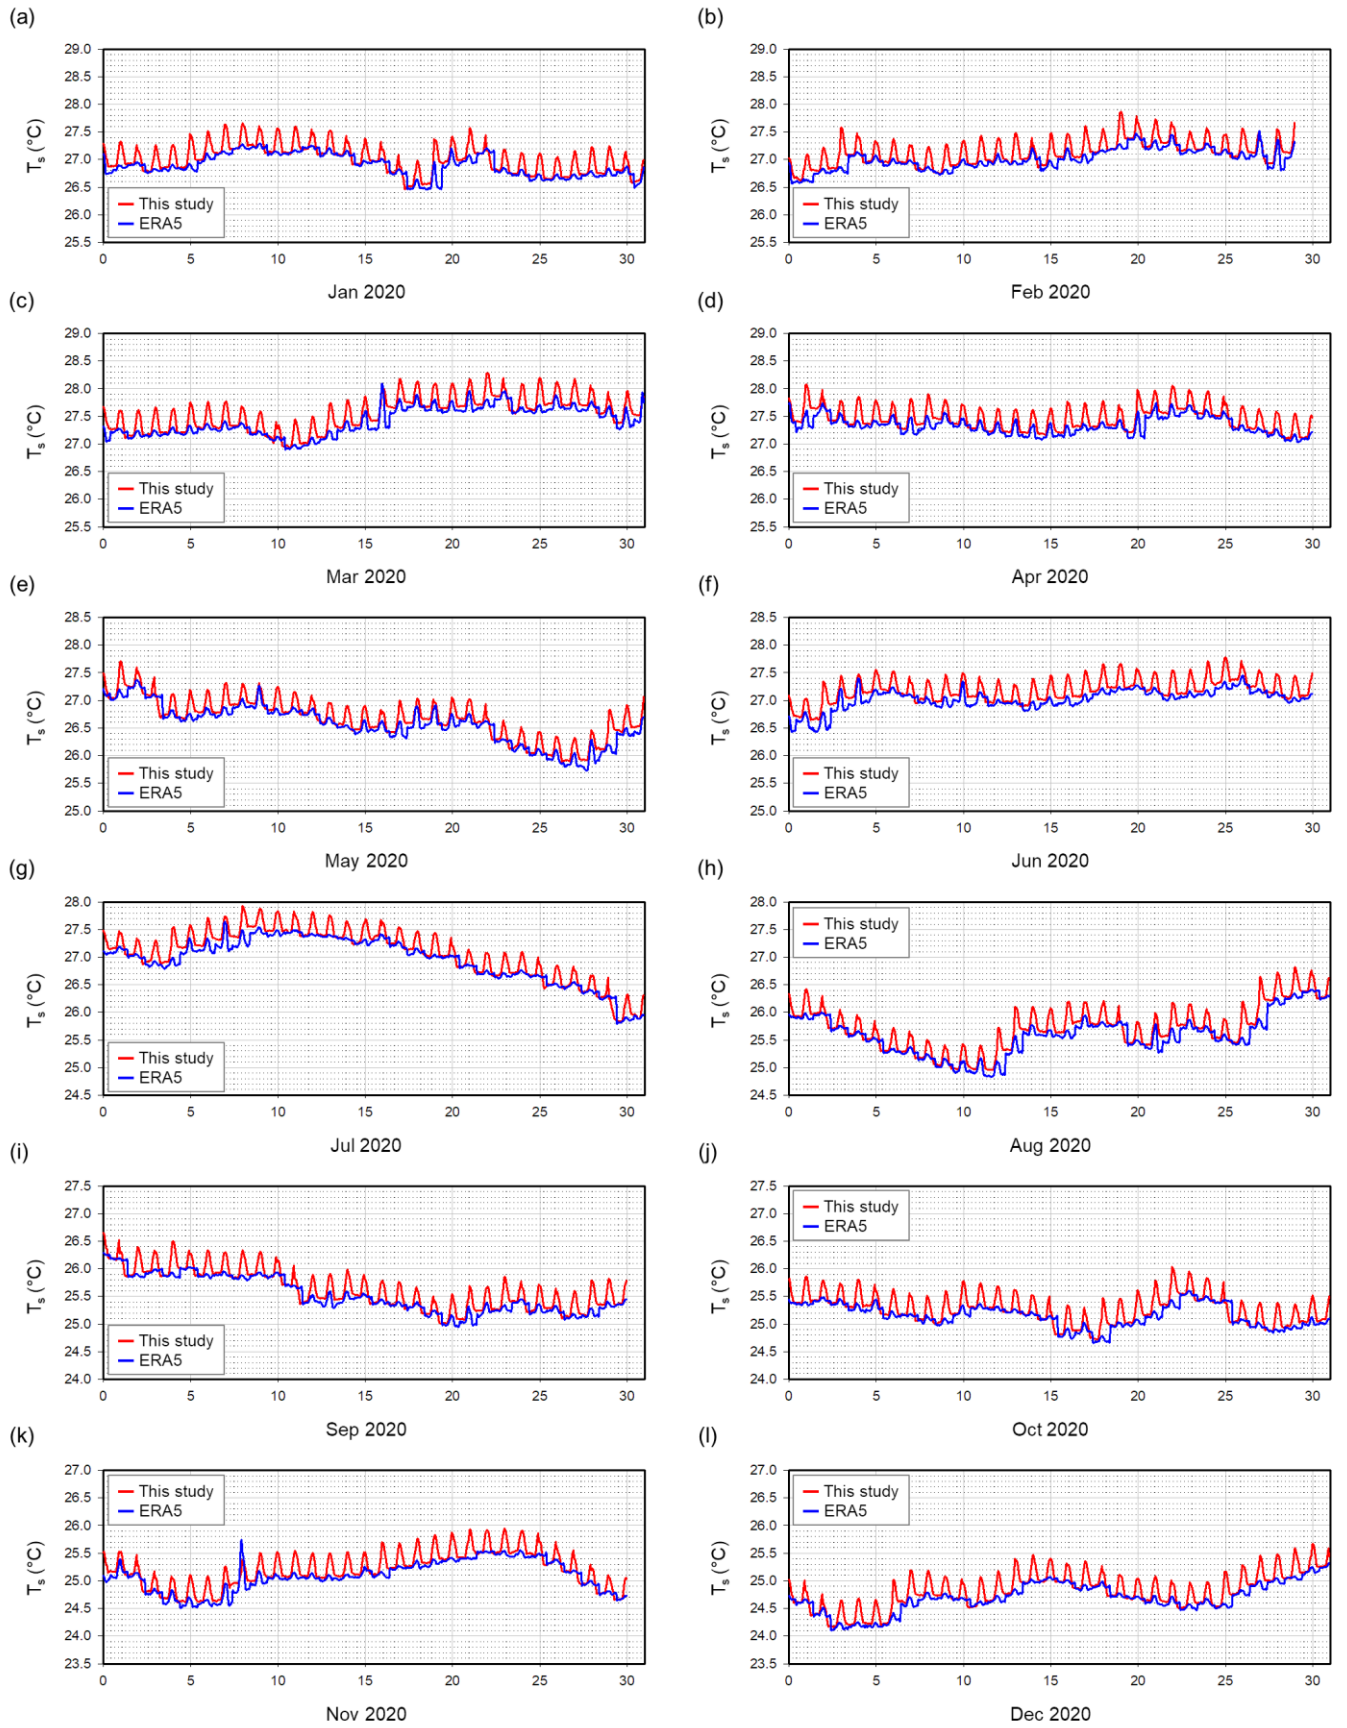

**Figure S2.** Time series of  $T_s$  from the model simulations (red) and ERA5 (blue) at the location of  $0^\circ\text{N}$ ,  $155^\circ\text{W}$  from January to December 2020..

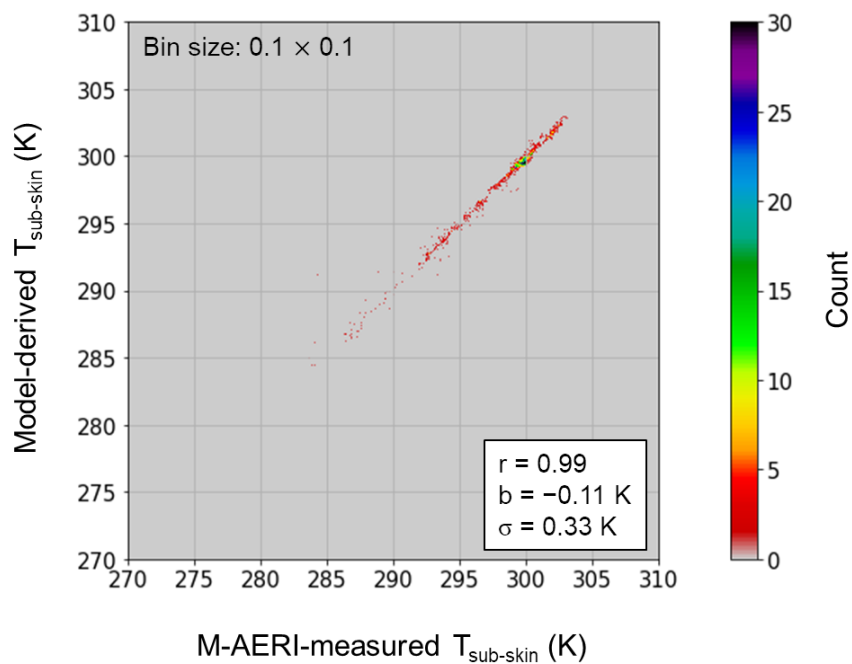

**Figure S3.** Scatterplot of model-derived IR equivalent temperature with a scaling factor of 0.2 applied to the Saunders constant vs. M-AERI-measured temperature in the year 2020. The color scale represents the data count. The  $r$ ,  $b$ , and  $\sigma$  in the inset denote the correlation coefficient, mean deviation, and standard deviation, respectively.
